# Supplementary material for: Differential Transcriptomic Response of Rainbow Trout to Infection with Two Strains of IPNV
Source: MDPI journal article supplement (doi:10.3390/v14010021), 2021-12-23
Supplement: s1 [file s1]

## Supplementary materials

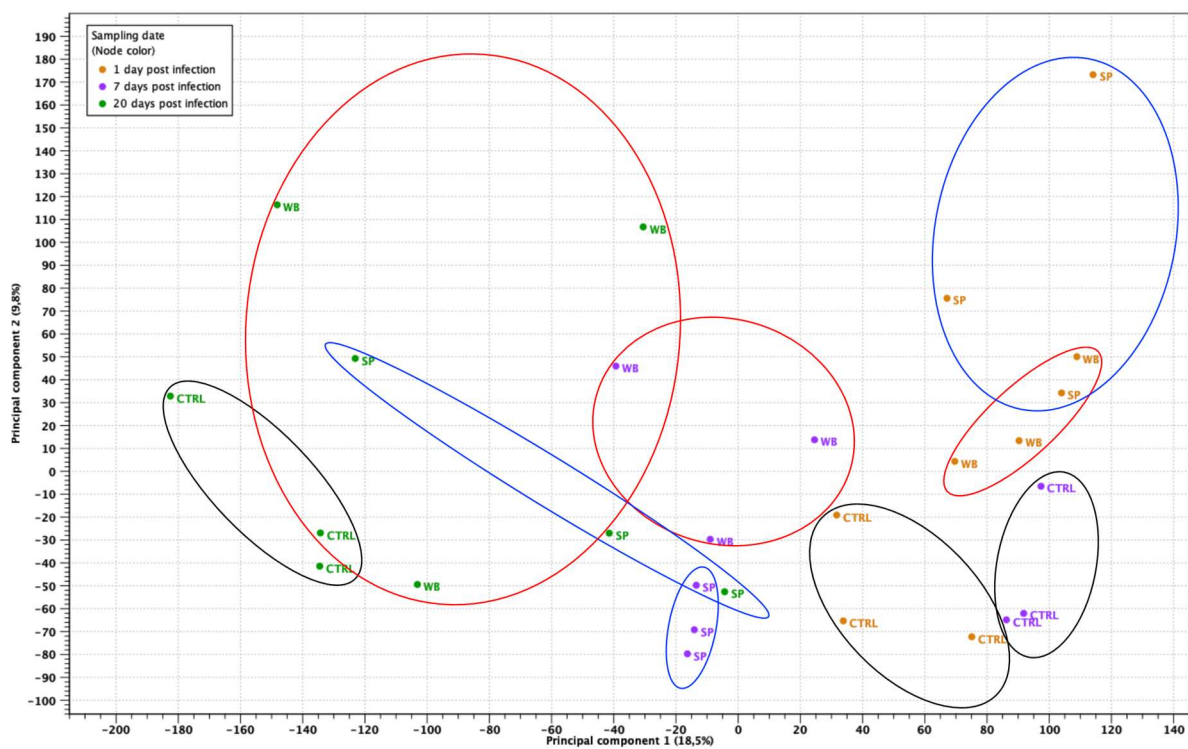

Figure S1. Principal component analysis of RNA-seq samples

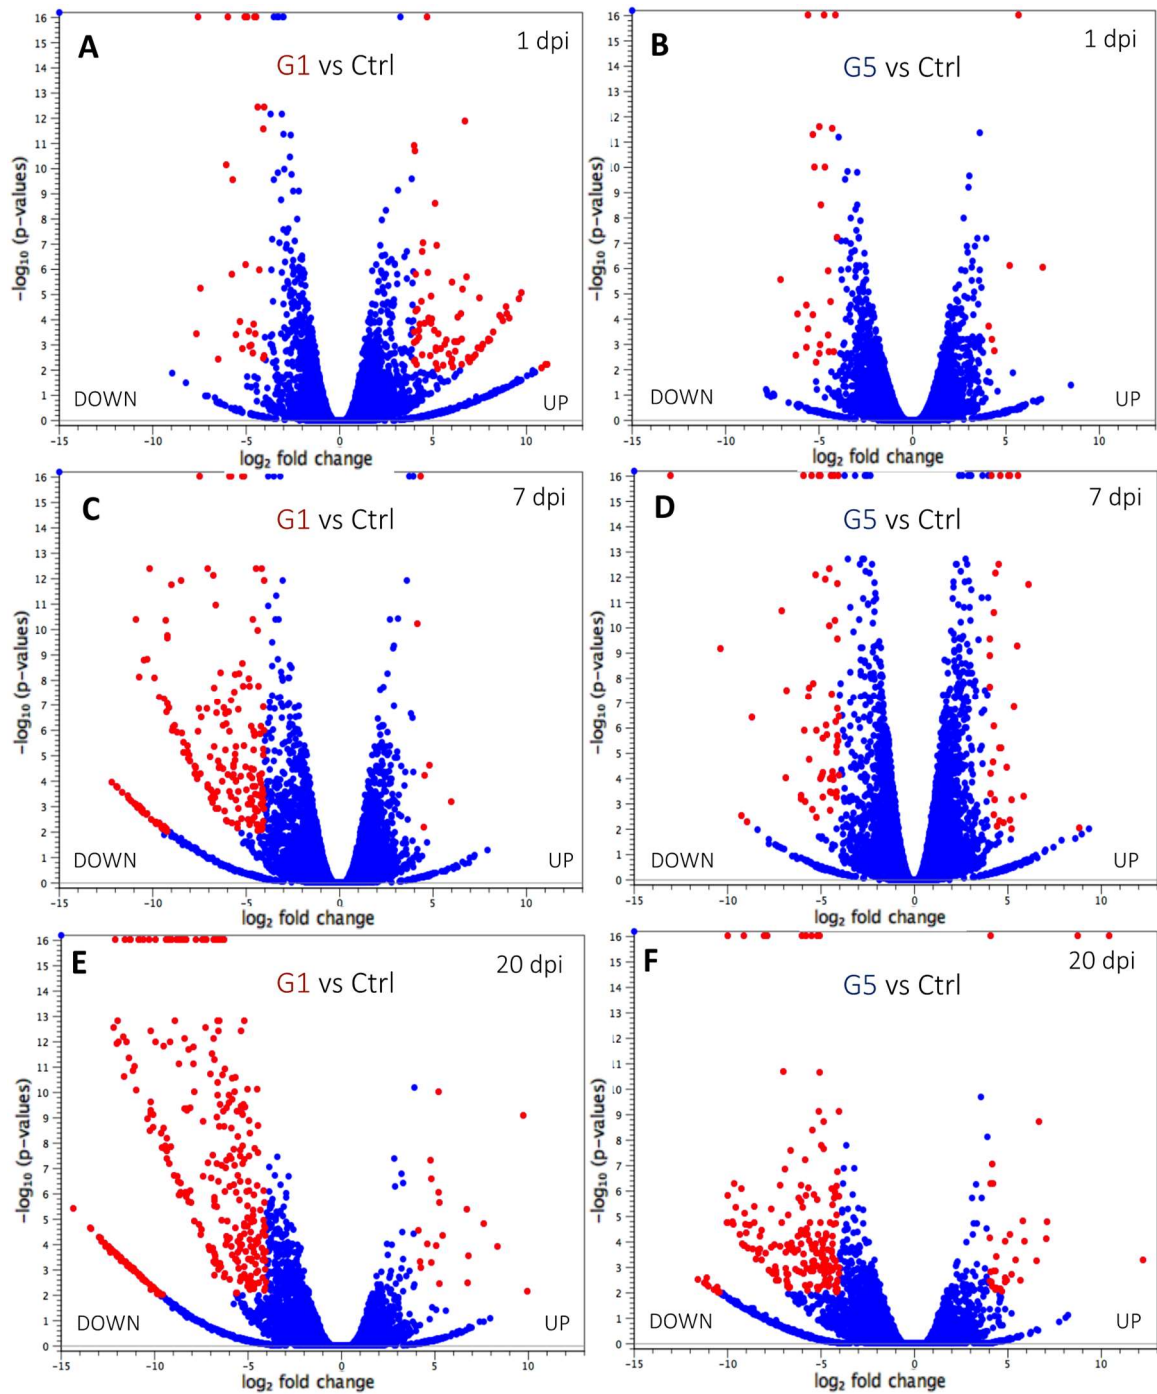

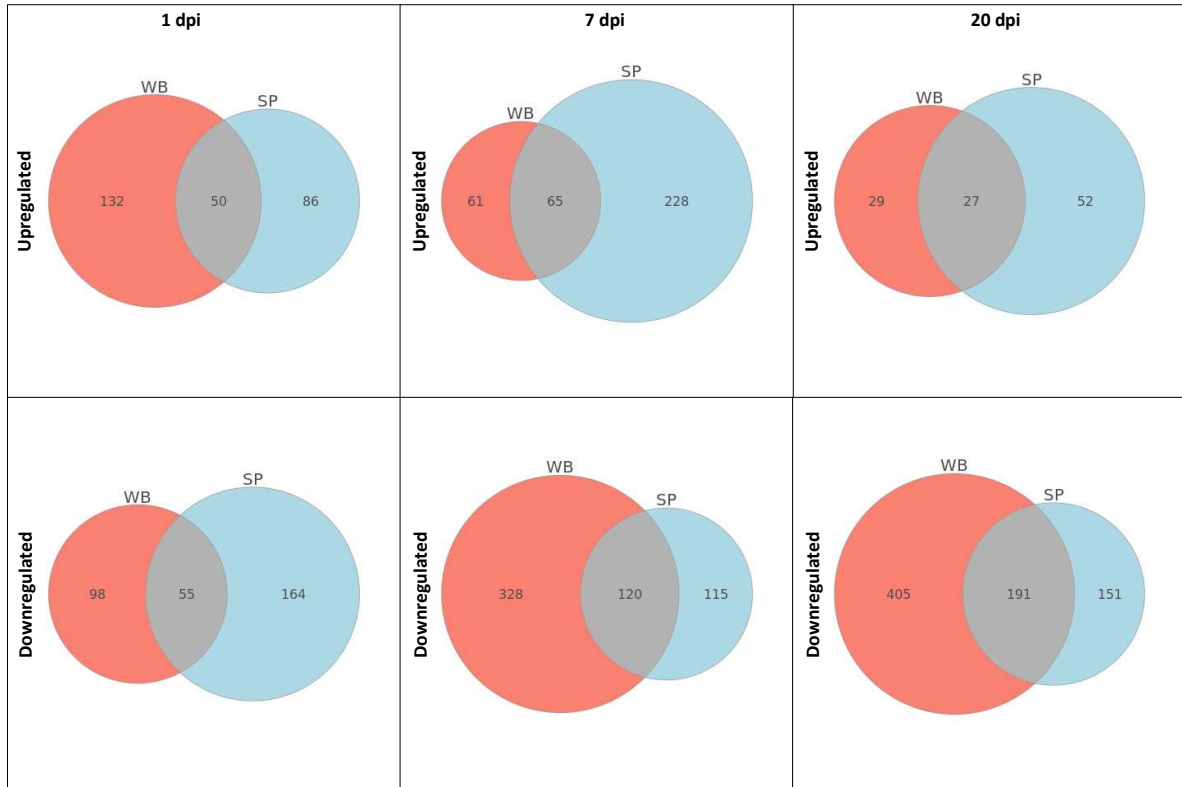

Figure S3. Venn diagrams of differentially expressed genes with respect to the control in fish challenged with RTTX (WB) and ALKA (SP) at days 1, 7 and 20 post-challenge.

Table S1. Immune response related genes differentially expressed (up and down regulated) in fish challenged with IPNV isolates RTTX and ALKA. The human homologues for each group are shown, as well as those that were common between both groups (BOTH)

| Group | Regulation | 1 dpc             | 7 dpc                 | 20 dpc                    |
|-------|------------|-------------------|-----------------------|---------------------------|
| ALKA  | Up         | CD79B             | TRIM39 TRIM21 CRP     | TRIM39 GBP4 IGLL5 MID2    |
|       |            | C4B_2             | IGLL5 ZC3H12A SLC26A6 | MAP3K14 ST3GAL1 PTGDS     |
|       |            | PLA2G3            | AHR EDN1 ARG2 CD209   | CLEC4M NPPA CFHR1         |
|       |            | APOA4 MR1 CD200   | AXL UMOD MX2 MRC1     | PGC                       |
|       |            | PTGDS CFP TLR5    | RGCC NFKBID FTH1      | GP2                       |
|       |            | MPO CST3 ITGB7    | CRISP3 HEBP2 COL17A1  |                           |
|       |            | AHSG S100A11      | FOLR3 MUC5B TNFAIP6   |                           |
|       |            | LEAP2 PROS1       | AMPD3 TCN1 EEF2 GAA   |                           |
|       | Down       |                   | PSAP MUC5AC           |                           |
|       |            | CRP ZP3 ST3GAL1   | TRIM35 IGLL1          | TRIM39 MEFV TRIM35 LGP2   |
|       |            | ARG2 USP14 FGL2   | TRIM27 APOL1          | APOA4 FRK STAT1 GBP1 CRP  |
|       |            | PI4K2A HEBP2 CUL1 | CYP27B1 TRIM25        | HLA-E RSAD2 IFI44L IFITM3 |
|       |            | PSMD11 SNAP25     | CD200 PTGDS HERC5     | HLA- CCL19 TRIM25         |
|       |            | AMPD3 TSHB CRH    | DQB1 GCG ADGRE5       | ZC3H12A IFIT1 B2M         |
|       |            | S100B GYG1        |                       | FCER2 ZC3HAV1             |
|       |            | PSMD12 MBP        |                       | PCK1 HERC5 IFIT5          |
|       | Down       |                   |                       | MX1 PNP NLRC3             |
|       |            |                   |                       | EGR1 AMPD3                |
|       |            |                   |                       | MUC3A FOS SOCS3           |
|       |            |                   |                       | MUC5AC                    |
| BOTH  | Up         | HHLA2 TKFC MX1    | TRIM35 HSP90AA1       | TRIM25 HSP90AA1 FGA HEL-  |
|       |            | NLRC3 HEL111      | SPHK2 PCK1 PNP CST3   | S-72p                     |
|       | Down       |                   |                       | MUC3A                     |
|       |            | HSP90AA1 ARG2     | STAT1 HEL-S-62p       | RSAD2 BTN1A1 HEL-S-62p    |
|       |            | CD209 CLEC4M      | IFI44L MFAP4          | PLA2G3 TRIM21 MFAP4       |
|       |            | PCK1 MRC1 HEL-S-  | APOA4 USP18           | CLEC4M CCL19 CEACAM1 ZP4  |
|       |            | 72p AMPD3 PSMD13  | HERC5 IFIT5 MX1       | NPPA ZC3H12A ZP3 CD209    |
|       |            |                   | TLR5 DNAJC3 XAF1      | VCAM1 CLEC4M IRF5 HERC5   |
|       |            |                   | S100A11 LEAP2         | MUC3A UMOD MRC1 IFI27     |
|       |            |                   | LRG1 CFHR1            | MPO TIMP2                 |
|       | Down       |                   |                       | PS1TP5BP1 TCN1            |
|       |            |                   |                       | EEF1A1 FOS                |
| RTTX  | Up         | CTSV ZP4          | TRIM25 REG1B LGALS3   | VCP APOA4 PRF1 GP2        |
|       |            | ZP3 LGALS3        | HK1                   | COL17A1 NCAM1             |
|       |            | UMOD              | NPPA                  |                           |
|       |            | AKAP1 GP2         | TIMP2                 |                           |
|       |            | EEF1A1            | PSAP                  |                           |
|       |            |                   |                       |                           |
|       |            |                   |                       |                           |
|       |            |                   |                       |                           |

|      |           |           |        |        |         |           |         |           |         |
|------|-----------|-----------|--------|--------|---------|-----------|---------|-----------|---------|
|      | HEL-S-62p | IFITM3    | MEFV   | TRIM35 | CCL20   | HEL-S-    | RIPK2   | CD274     | CTSL    |
|      | MFAP4     | CEACAM1   | 62p    | CTSV   | IFI44L  | MFAP4     | CTSV    | MFAP4     | TRIM39  |
|      | ACOD1     | CYP27B1   | CXCL11 | CCL19  | TRIM39  | AHR       | ZP4     | ZP3       | CST7    |
|      | NOS2      | ARG2      | C7     | ACOD1  | ZP4     | TRIM25    | ZP3     | CD209     | CLEC10A |
|      | CLEC4E    | UMOD      | CST7   | IRF5   | CLEC10A | CLDN1     | HPRT1   | UMOD      | TLR5    |
|      | TLR5      | GP2       | PIK3CG | UMOD   | IFI27   | BMP6      | ALDH3B1 | MAP3K5    | AKAP1   |
|      | LRP1      | HEL-S-72p | ADM2   | HEL57  | TIMP2   | PS1TP5BP1 | NLRC3   | FTH1      | DLL1    |
| Down | GPR84     | LRG1      | SOCS3  | MMP9   | CAND1   | GPR45     | ALDH3B1 | HEL57     |         |
|      |           |           |        | EEF1A1 | HP      |           | TIMP2   | PS1TP5BP1 |         |
|      |           |           |        |        |         |           | LYZ     | RAPGEF4   |         |
|      |           |           |        |        |         |           | SYNGR1  | MMP9      | GLA     |
|      |           |           |        |        |         |           | NPDC1   | PADI2     | CTSD    |
|      |           |           |        |        |         |           | XAF1    | GYG1      | APEH    |
|      |           |           |        |        |         |           | TSHR    | PSMC3     |         |
|      |           |           |        |        |         |           | ADGRG3  |           |         |

---
